# Supplementary material for: Role of the consent form in UK veterinary practice
Source: PubMed Central journal article supplement (PMC7606496; doi:10.1136/vr.105762), 2020-10-15
Supplement: vetrec-2019-105762supp001.pdf [file vetrec-2019-105762supp001.pdf]

## SPECIMEN FORM OF CONSENT FOR ANAESTHESIA, CLINICAL AND SURGICAL PROCEDURES, BASED ON RCVS VERSION

Owner details

*Printed label from client records*

Patient details

*Printed from patient records*

**To be completed by person taking consent:**

Details of the **Operation/Procedure** \_\_\_\_\_

**Alternatives** discussed \_\_\_\_\_

**Risks** discussed \_\_\_\_\_

\_\_\_\_\_

Benefits to the patient of having this procedure

\_\_\_\_\_

Pre-operative blood tests recommended for this patient, **YES/NO**: cost explained

Client agrees to/requests blood tests  Client declines blood tests

Any other procedures requested by client, with costs

\_\_\_\_\_

The **cost** of the procedures described above (tick as appropriate)

will be: £\_\_\_\_\_ OR

will be within the range: £\_\_\_\_\_ to £\_\_\_\_\_

Inclusive of: VAT \_\_\_\_\_

Any financial limit placed by owner? **YES/NO** Amount:

**To be completed by owner or authorised agent:**

In order to protect the welfare of my animal, in the unlikely event of an emergency, or where additional pain relief or sedation may be required, I understand the veterinary surgeon may decide to use medicines that are not authorised for use in [state species].

**Contact number in case of emergency:** \_\_\_\_\_

- I accept this estimate of costs and agree to pay on collection of the animal.
- I agree that the proposed procedures have been explained to me, I have had the opportunity to ask questions, and I understand and accept the risks involved.
- I give my consent to the treatment agreed
- I am the owner of this animal **OR**
- I am not the owner, but I have the authority to act on behalf of the owner of the animal described above
- I confirm that I am over the age of 18

Signature of person giving consent:

\_\_\_\_\_

Date:

**I confirm that I am over the age of 18, and that I have explained the proposed procedure, alternatives, risks and benefits**

Signature of person obtaining consent:

\_\_\_\_\_

Date:

Copy given to client:
